# Supplementary material for: Investigation of the formation process of zeolite-like 3D frameworks constructed with ε-Keggin-type polyoxovanadomolybdates with binding bismuth ions and preparation of a nano-crystal
Source: Royal Society of Chemistry journal article supplement (doi:10.1039/c4dt01227e), 2014-07-16
Supplement: c4dt01227e1.pdf [file c4dt01227e1.pdf]

**Supporting information for**

**Investigation of the Formation Process of Zeolite-like 3D Frameworks Constructed with  $\epsilon$ -Keggin-type Polyoxovanadometalates with Binding Metal Ions and Preparation of a Nano-crystal.**

*Zhenxin Zhang<sup>1</sup>, Masahiro Sadakane<sup>\*2,3</sup>, Toru Murayama<sup>1</sup>, and Wataru Ueda<sup>\*1</sup>*

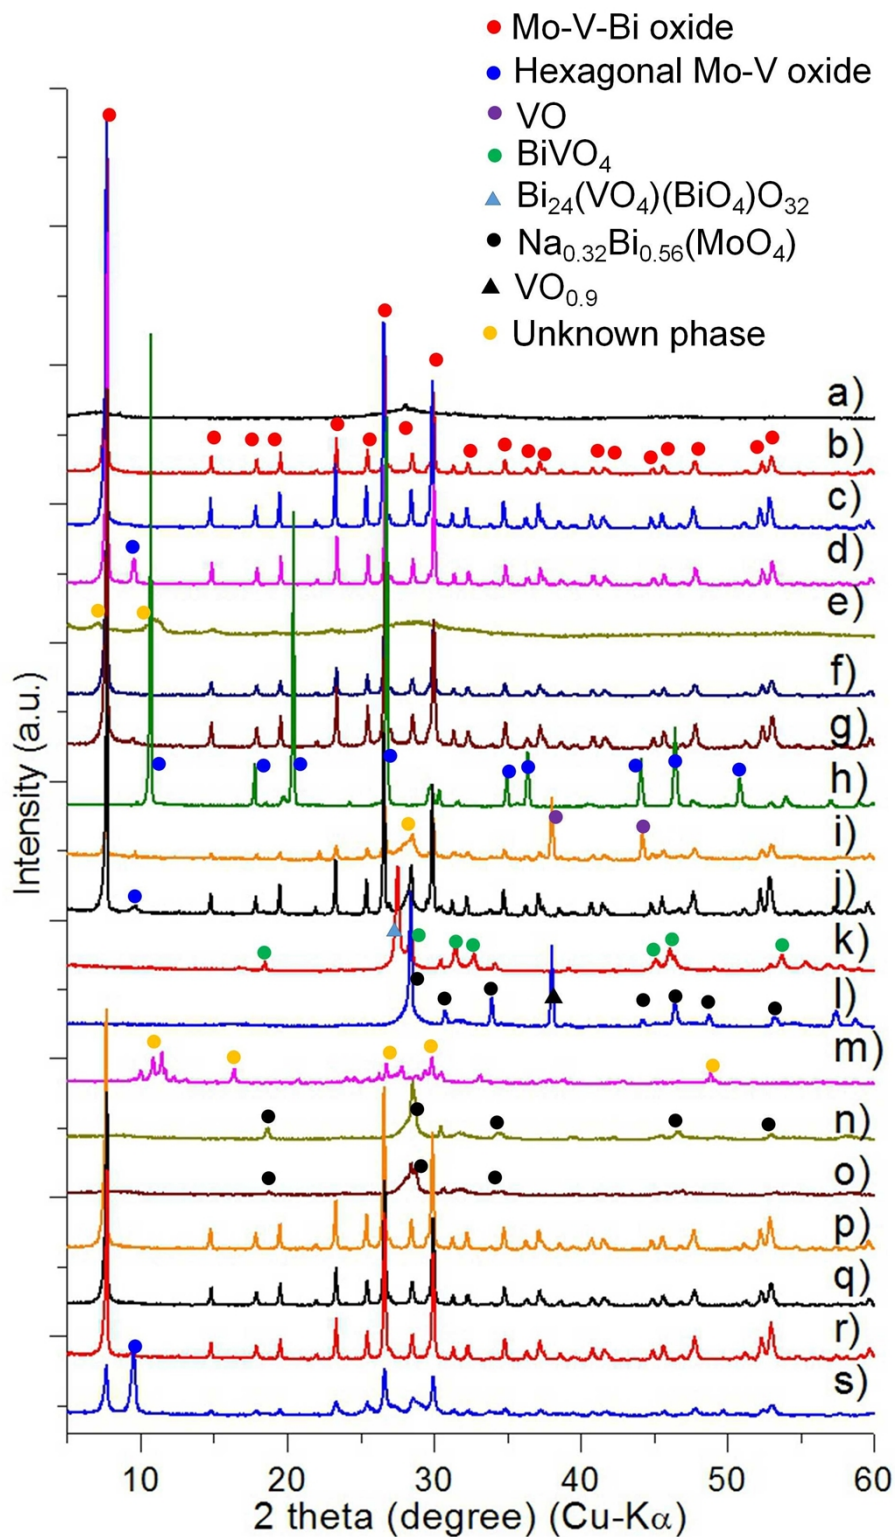

**Fig. S 1.** XRD patterns of resulting materials synthesized under different conditions shown in Table 1: (a) entry 1, (b) entry 2, (c) entry 3, (d) entry 4, (e) entry 5, (f) entry 6, (g) entry 7, (h) entry 8, (i) entry 9, (j) entry 10, (k) entry 11, (l) entry 12, (m) entry 13, (n) entry 14, (o) entry 15, (p) entry 16, (q) entry 17, (r) entry 18, and (s) entry 19, PDF numbers, hexagonal Mo-V oxide: 00-021-0569, VO: 03-065-2896, BiVO<sub>4</sub>: 00-048-0744, Bi<sub>24</sub>(VO<sub>4</sub>)(BiO<sub>4</sub>)O<sub>32</sub>: 01-080-0837, Na<sub>0.32</sub>Bi<sub>0.56</sub>(MoO<sub>4</sub>): 01-079-2241, and VO<sub>0.9</sub>: 01-078-0721.

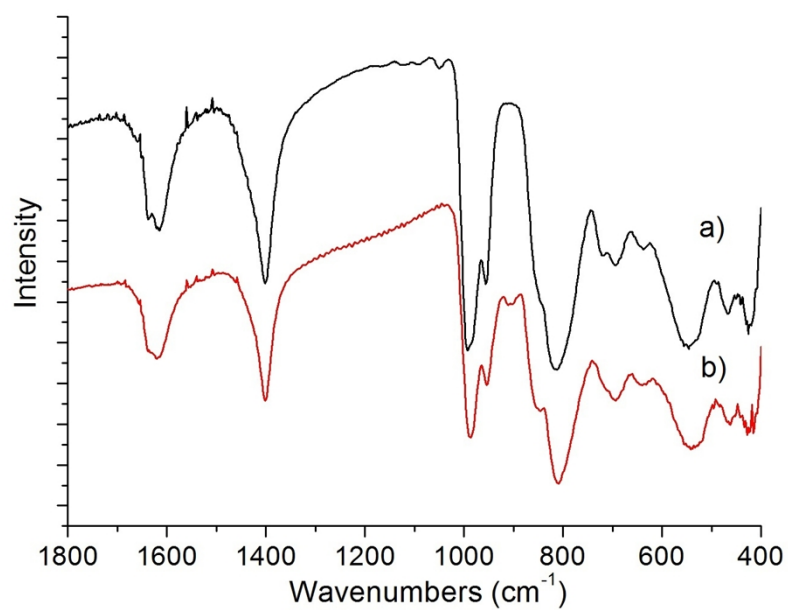

**Fig. S 2.** FT-IR spectra of (a) Mo-V-Bi oxide and (b) nano-Mo-V-Bi oxide.

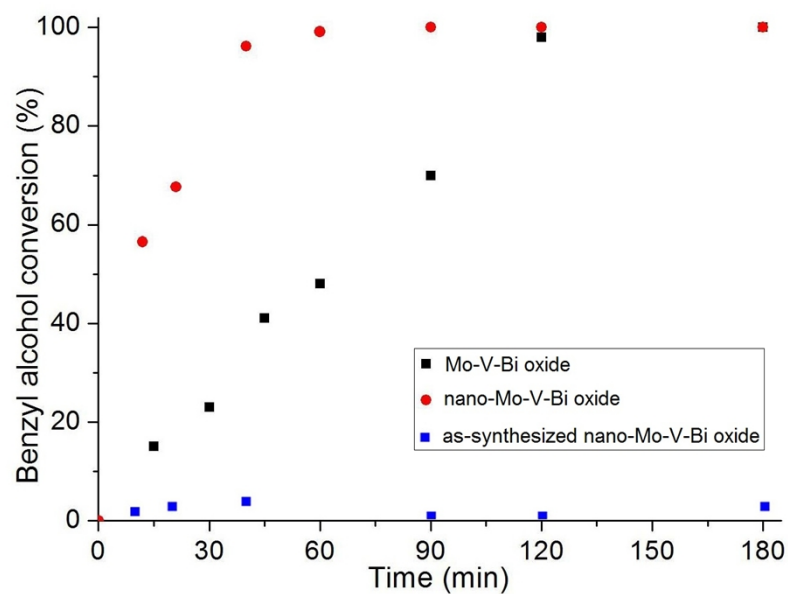

**Fig. S 3.** Benzyl alcohol etherification catalyzed by Mo–V–Bi oxides. Reaction conditions: 20 mg of Mo–V–Bi oxide, 10 mmol of benzyl alcohol, 1 mmol of tridecane added as an internal standard, 403 K, 3 h.

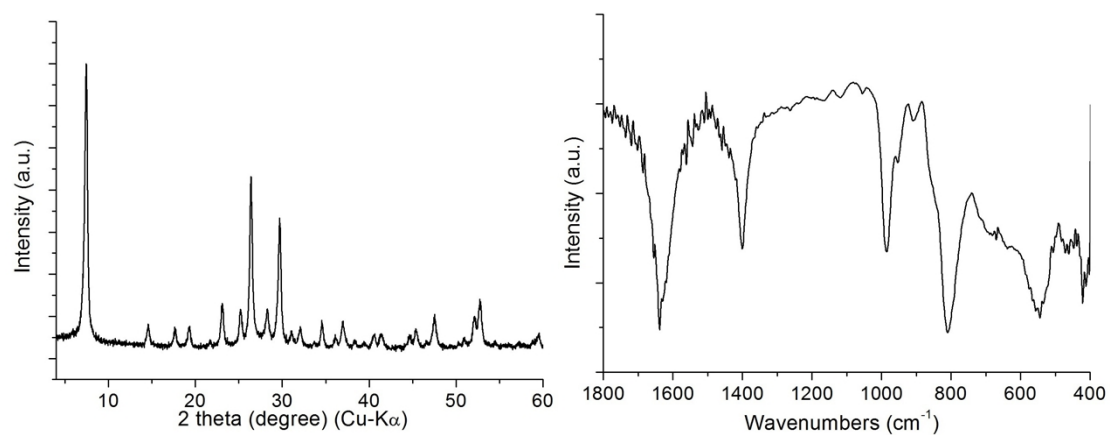

**Fig. S 4.** (left) XRD patterns and (right) FT-IR spectra of the solid obtained under the following conditions:  $(\text{NH}_4)_6\text{Mo}_7\text{O}_{24}\cdot 4\text{H}_2\text{O}$ : 8.33 mmol based on Mo,  $\text{VOSO}_4\cdot 5\text{H}_2\text{O}$ : 2.08 mmol, 1.4 mmol of  $\text{Bi}(\text{NO}_3)_3\cdot 5\text{H}_2\text{O}$  in 1.7 mL of water-glycerol (1:1), 40 mL of water, 373 K, 150 min, pH adjusted to 3.4 by  $\text{NH}_3$  solution (28%).

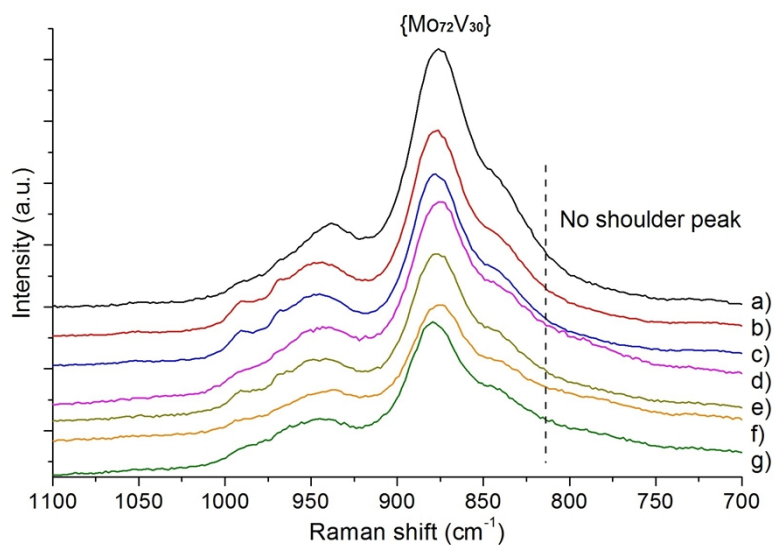

**Fig. S 5.** Raman spectra of solutions of  $(\text{NH}_4)_6\text{Mo}_7\text{O}_{24}\cdot 4\text{H}_2\text{O}$  and  $\text{VOSO}_4\cdot 5\text{H}_2\text{O}$  under the following conditions:  $(\text{NH}_4)_6\text{Mo}_7\text{O}_{24}\cdot 4\text{H}_2\text{O}$ : 8.33 mmol based on Mo,  $\text{VOSO}_4\cdot 5\text{H}_2\text{O}$ : 2.08 mmol, 40 mL of water, 1.7 mL of solution (water: glycerol = 1: 1), pH of 3.4, 373 K, synthesis time, (a) 0 min, (b) 7 min, (c) 15 min, (d) 20 min, (e) 30 min, (f) 60 min, and (g) 150 min.

**Table S 1.** Solubility of bismuth compounds determined by elemental analysis. <sup>a)</sup>

| entry           | Materials                                       | Material amount<br>(mmol based on metal) | Water amount<br>(mL) | Ion concentration<br>(mmol/L) |
|-----------------|-------------------------------------------------|------------------------------------------|----------------------|-------------------------------|
| 1               | Bi(OH) <sub>3</sub>                             | 0.281                                    | 40                   | 2.54×10 <sup>-5</sup>         |
| 2               | Bi <sub>2</sub> O <sub>3</sub>                  | 0.281                                    | 40                   | 4.93×10 <sup>-5</sup>         |
| 3               | BiOCl                                           | 0.281                                    | 40                   | 0                             |
| 4               | Bi <sub>2</sub> (SO <sub>4</sub> ) <sub>3</sub> | 0.281                                    | 40                   | 0.0288                        |
| 5               | Bi(NO <sub>3</sub> ) <sub>3</sub>               | 0.281                                    | 40                   | 5.41                          |
| 6               | Bi(NO <sub>3</sub> ) <sub>3</sub>               | 1.402                                    | 40                   | 7.91                          |
| 7 <sup>b)</sup> | Bi(NO <sub>3</sub> ) <sub>3</sub>               | 1.402                                    | 40                   | 9.98                          |
| 8 <sup>c)</sup> | AHM                                             | 8.33                                     | 40                   | 208                           |
| 9 <sup>c)</sup> | VOSO <sub>4</sub>                               | 2.08                                     | 40                   | 52                            |

<sup>a)</sup> Materials were added to water and stirred for 10 min. The solutions were filtered with a membrane filter before ICP measurement. <sup>b)</sup> 0.85 mL of glycerol was added to 40 mL of water. <sup>c)</sup> AHM and VOSO<sub>4</sub> can be dissolved completely in this condition and theoretical values are shown.
